# Supplementary material for: Doping effects on the antibonding states and carriers of two-dimensional PC6
Source: Royal Society of Chemistry journal article supplement (doi:10.1039/d2cp00848c), 2022-01-01
Supplement: d2cp00848c1.pdf [file d2cp00848c1.pdf]

# Supplementary Materials

## The doping effects on antibonding states and carriers of two-dimensional $\text{PC}_6$

*Mi Zhong*<sup>a</sup>, *Wei Zeng*<sup>b</sup>, *Han Qin*<sup>c</sup>, *Sheng-Hai Zhu*<sup>a</sup>, *Xing-Han Li*<sup>a</sup>, *Fu-Sheng Liu*<sup>a</sup>, *Bin Tang*<sup>d</sup>, *Qi-Jun Liu*

*a, \**

<sup>a</sup> School of Physical Science and Technology, Southwest Jiaotong University, Chengdu 610031, People's Republic of China

<sup>b</sup> Teaching and Research Group of Chemistry, College of Medical Technology, Chengdu University of Traditional Chinese Medicine, Chengdu 610075, People's Republic of China

<sup>c</sup> School of Science, Xihua University, Chengdu 610039, People's Republic of China

<sup>d</sup> State Key Laboratory of Solidification Processing, Northwestern Polytechnical University, Xi'an 710072, People's Republic of China

Correspondence about the paper at the following address and e-mail address:

School of Physical Science and Technology, Southwest Jiaotong University, Chengdu, Sichuan 610031, People's Republic of China

Qi-Jun Liu, E-mail: [qijunliu@home.swjtu.edu.cn](mailto:qijunliu@home.swjtu.edu.cn)

---

\* Corresponding author. E-mail: [qijunliu@home.swjtu.edu.cn](mailto:qijunliu@home.swjtu.edu.cn)

**Contents:**

**Figure S1.** Calculated total energies as a function of N for the doped PC<sub>6</sub>, N is optimization step.

**Table S1** The optimized lattice constants, bond length, and bond angle of doped PC<sub>6</sub> along with the pure system.

**Figure S2.** The top and side views of the doped PC<sub>6</sub>, dopants in black. (a) the bond length and bond angle corresponding to the ones in Table 1. (b) P-site substituted systems with carbon-coplanar dopants (C, N, and O atoms). (c) C-site substituted systems with carbon-coplanar dopants (Si, N, B, Al and Ga). (d) P-site substituted systems with dopants above the carbon-plane (Si, Ge, Sn, As, Sb, S, Se, Te). (e) C-site substituted systems with dopants above the carbon-plane (Ge, P, As and Sb atoms). (f) C-site substituted systems with dopants below the carbon plane (In and Sn atom).

**Figure S3.** (a1) and (b1) The total density of states (TDOS) for the X-doped PC<sub>6</sub>. (a2) and (b2) Partial density of states (PDOS) for the X-doped PC<sub>6</sub>. X dopants from group IV and VI. In TDOS, the red line is for spin-up states and the black line is for spin-down states.

**Figure S4.** Spatial spin density distributions of the group IV and VI substitutional doped PC<sub>6</sub> (Yellow/blue color represents the spin-up/down density distributions).

**Table S2.** The actually Fermi energy (EF') and normalized position of Fermi level.

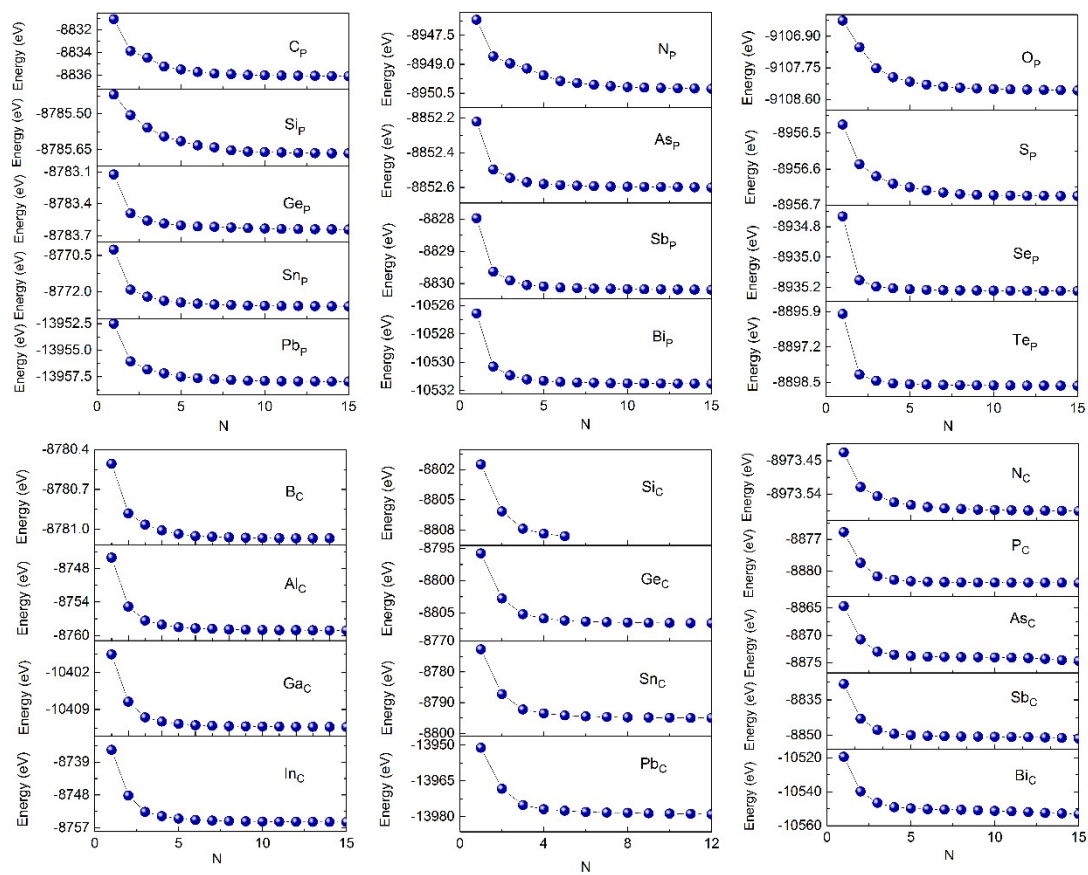

**Figure S1.** Calculated total energies as a function of  $N$  for the doped  $PC_6$ ,  $N$  is optimization step.

**Table S1** The optimized lattice constants, bond length, and bond angle of doped PC6 along with the pure system.

|                 | $a, b$ (Å)     | $d$ (Å) | $\theta$ (°) |                 | $a, b$ (Å)     | $d_1$ (Å) | $d_2$ (Å) | $\theta_1$ (°) | $\theta_2$ (°) |
|-----------------|----------------|---------|--------------|-----------------|----------------|-----------|-----------|----------------|----------------|
| pure            | 13.395, 13.395 | 1.804   | 98.173       | pure            | 13.395, 13.395 | 1.360     | 1.804     | 116.697        | 125.000        |
| IV group        |                |         |              | III group       |                |           |           |                |                |
| C <sub>P</sub>  | 13.373, 13.373 | 1.438   | 119.845      | B <sub>C</sub>  | 13.458, 13.419 | 1.488     | 1.860     | 117.427        | 126.122        |
| Si <sub>P</sub> | 13.448, 13.448 | 1.733   | 108.339      | Al <sub>C</sub> | 13.511, 13.400 | 1.848     | 2.212     | 113.997        | 112.399        |
| Ge <sub>P</sub> | 13.407, 13.410 | 1.947   | 93.706       | Ga <sub>C</sub> | 13.563, 13.444 | 1.858     | 2.195     | 120.643        | 115.677        |
| Sn <sub>P</sub> | 13.398, 13.398 | 2.097   | 86.707       | In <sub>C</sub> | 13.477, 13.375 | 1.990     | 2.419     | 97.914         | 105.760        |
| V group         |                |         |              | IV group        |                |           |           |                |                |
| N <sub>P</sub>  | 13.330, 13.330 | 1.427   | 119.802      | Si <sub>C</sub> | 13.529, 13.427 | 1.716     | 2.129     | 119.125        | 117.947        |
| As <sub>P</sub> | 13.397, 13.397 | 1.922   | 93.096       | Ge <sub>C</sub> | 13.479, 13.427 | 1.933     | 2.353     | 101.223        | 92.487         |
| Sb <sub>P</sub> | 13.401, 13.401 | 2.059   | 88.118       | Sn <sub>C</sub> | 13.436, 13.381 | 2.104     | 2.675     | 71.609         | 87.703         |
| VI group        |                |         |              | V group         |                |           |           |                |                |
| O <sub>P</sub>  | 13.360, 13.358 | 1.532   | 116.691      | N <sub>C</sub>  | 13.370, 13.389 | 1.378     | 1.781     | 116.527        | 125.201        |
| S <sub>P</sub>  | 13.414, 13.414 | 1.790   | 101.012      | P <sub>C</sub>  | 13.480, 13.417 | 1.750     | 2.192     | 108.072        | 104.149        |
| Se <sub>P</sub> | 13.422, 13.422 | 1.915   | 96.127       | As <sub>C</sub> | 13.488, 13.418 | 1.877     | 2.285     | 104.167        | 97.430         |
| Te <sub>P</sub> | 13.424, 13.424 | 2.071   | 90.213       | Sb <sub>C</sub> | 13.490, 13.412 | 2.021     | 2.433     | 99.379         | 90.945         |

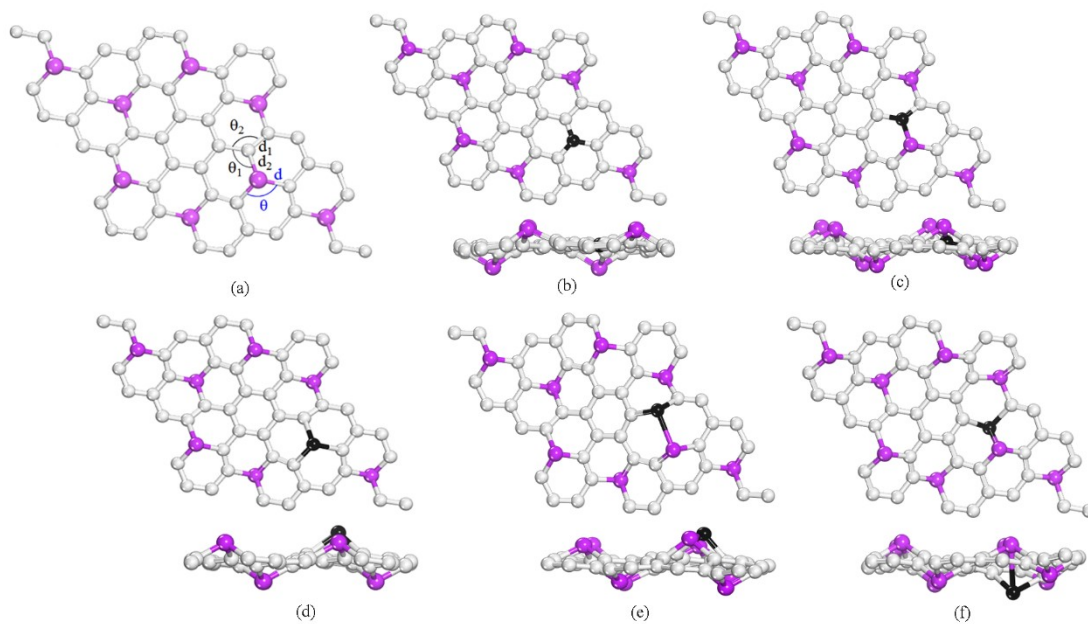

**Figure S2.** The top and side views of the doped PC<sub>6</sub>, dopants in black. (a) the bond length and bond angel corresponding to the ones in Table 1. (b) P-site substituted systems with carbon-coplanar dopants (C, N, and O atoms). (c) C-site substituted systems with carbon-coplanar dopants (Si, N, B, Al and Ga). (d) P-site substituted systems with dopants above the carbon-plane dopants (Si, Ge, Sn, As, Sb, S, Se, Te). (e) C-site substituted systems with dopants above the carbon-plane (Ge, P, As and Sb atoms). (f) C-site substituted systems with dopants below the carbon plane (In and Sn atom).

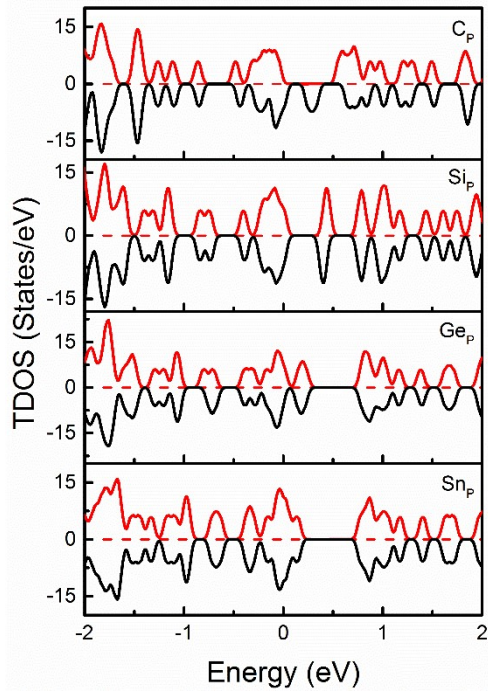(a<sub>1</sub>)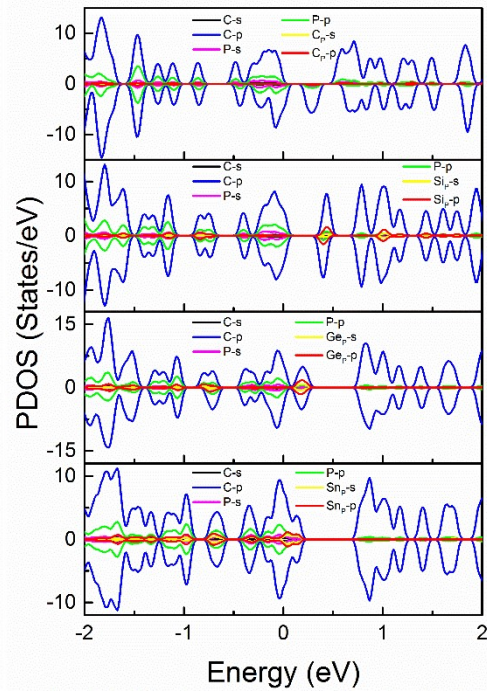(a<sub>2</sub>)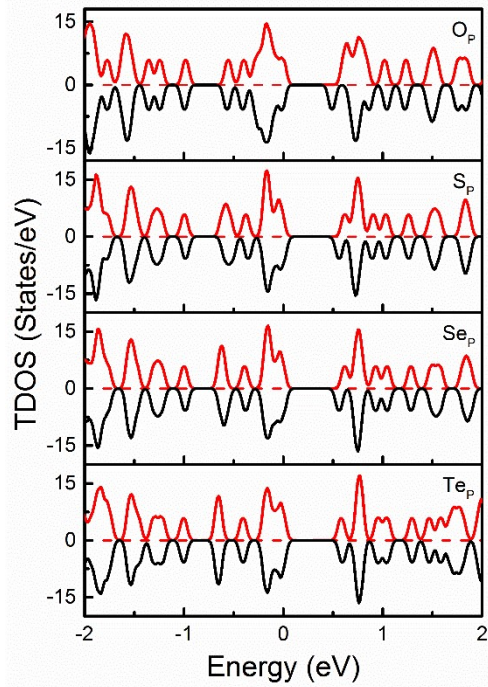(b<sub>1</sub>)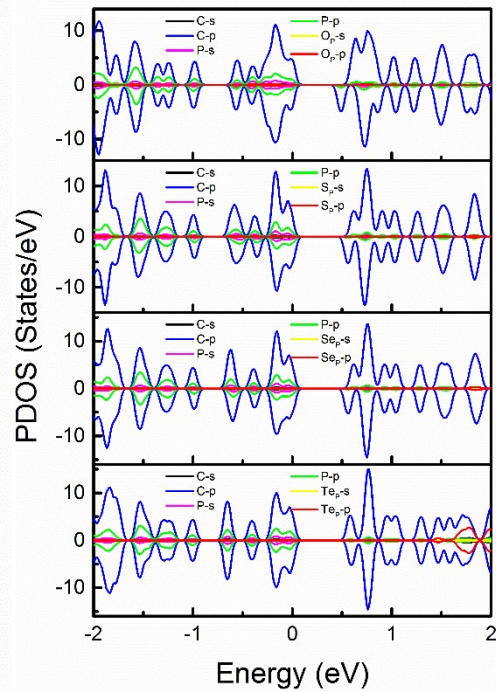(b<sub>2</sub>)

**Figure S3.** (a<sub>1</sub>) and (b<sub>1</sub>) The total density of states (TDOS) for the X-doped PC<sub>6</sub>. (a<sub>2</sub>) and (b<sub>2</sub>) Partial density of states (PDOS) for the X-doped PC<sub>6</sub>. X dopants from group IV and VI. In TDOS, the red line is for spin-up states and the black line is for spin-down states.

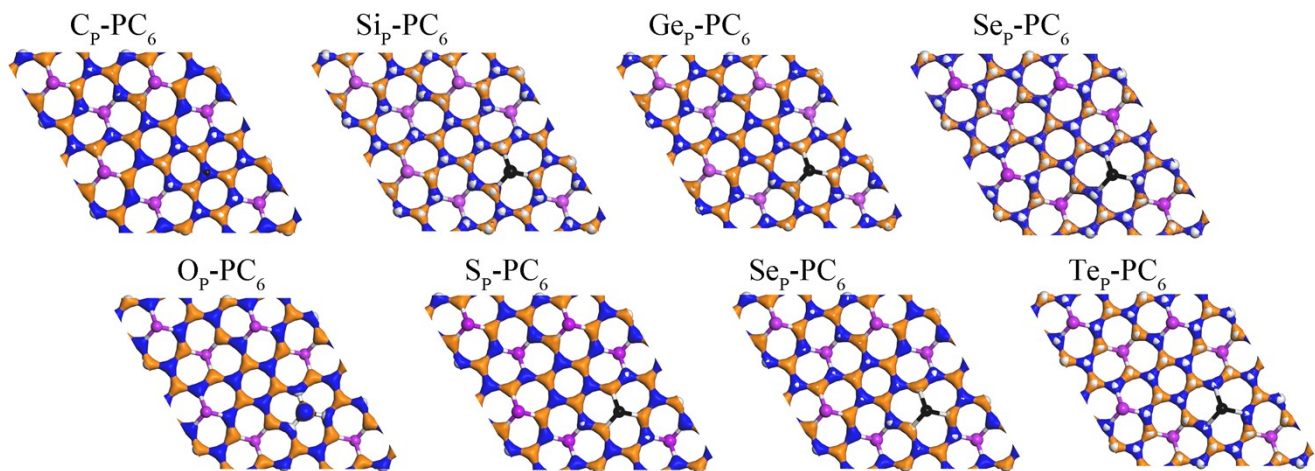

**Figure S4.** Spatial spin density distributions of the group IV and VI substitutional doped  $\text{PC}_6$  (Yellow/blue color represents the spin-up/down density distributions).

**Table S2.** The actually Fermi energy ( $E_{F'}$ ) and normalized position of Fermi level.

| Systems         | $E_{F'}$ | $E_F$ |
|-----------------|----------|-------|
| Pure            | -2.55    | 0.00  |
| Op              | -2.19    | 0.36  |
| Sp              | -2.20    | 0.36  |
| Sep             | -2.17    | 0.39  |
| Tep             | -2.12    | 0.43  |
| N <sub>C</sub>  | -2.30    | 0.25  |
| P <sub>C</sub>  | -2.35    | 0.20  |
| As <sub>C</sub> | -2.29    | 0.26  |
| Sb <sub>C</sub> | -2.32    | 0.23  |
